# Supplementary material for: Structural analysis and dye removal behavior of amorphous titania embedded poly(vinyl butyral) hybrid fiber
Source: Royal Society of Chemistry journal article supplement (doi:10.1039/d1ra07247a), 2022-01-01
Supplement: d1ra07247a1.pdf [file d1ra07247a1.pdf]

Supplementary information (Revised ESI)

## Structural analysis and dye removal behavior of amorphous titania embedded poly(vinyl butyral) hybrid fiber

Anamul Hoque Bhuiyan<sup>1,2</sup>, Mohammad Zakaria<sup>2</sup>, Koji Nakane<sup>1,\*</sup>

<sup>1</sup> Frontier Fiber Technology and Science, University of Fukui, 3-9-1 Bunkyo, Fukui 910-8507, Japan

<sup>2</sup> Department of Textile Engineering, Dhaka University of Engineering and Technology, Gazipur-1700, Bangladesh

Email: anamulhb@duet.ac.bd, zakariate@duet.ac.bd

(\* For correspondence: Koji Nakane ([nakane@matse.u-fukui.ac.jp](mailto:nakane@matse.u-fukui.ac.jp)))

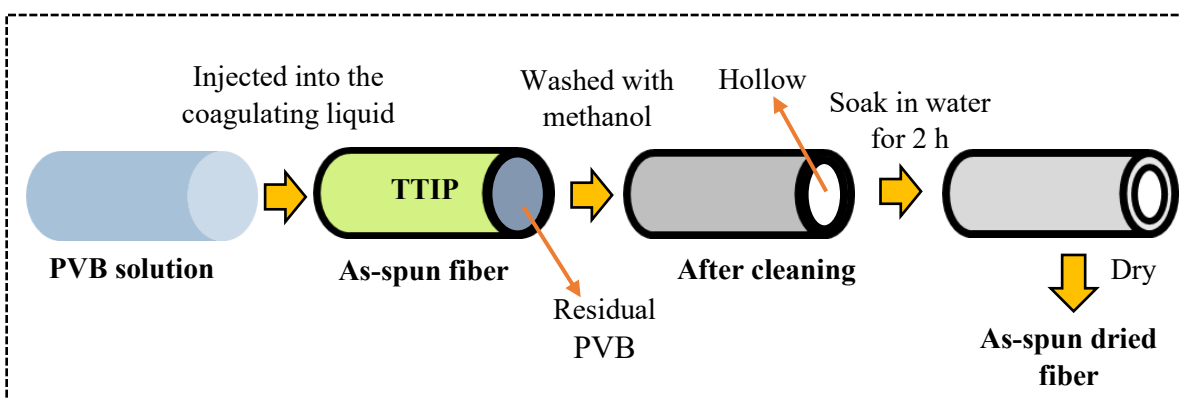

Fig. S1 Schematic principle of as-spun fiber preparation.

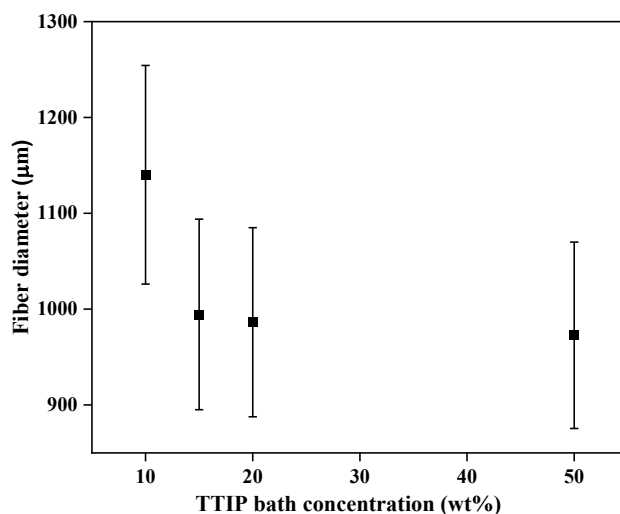

Fig. S2 Effect of TTIP bath concentrations on the PVB-amTiO<sub>2</sub>F diameters.

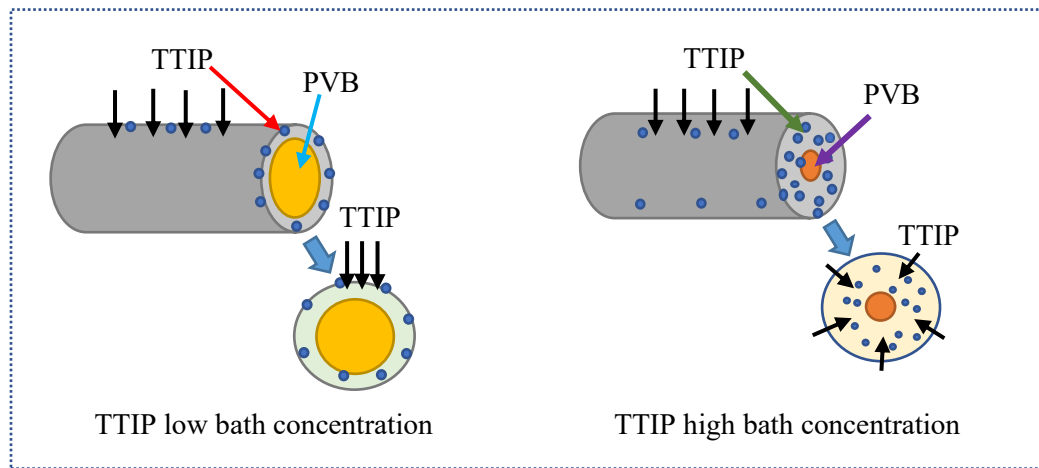

Fig. S3 Proposed structural representation of PVB-amTiO<sub>2</sub>F as a function of the TTIP bath concentration.

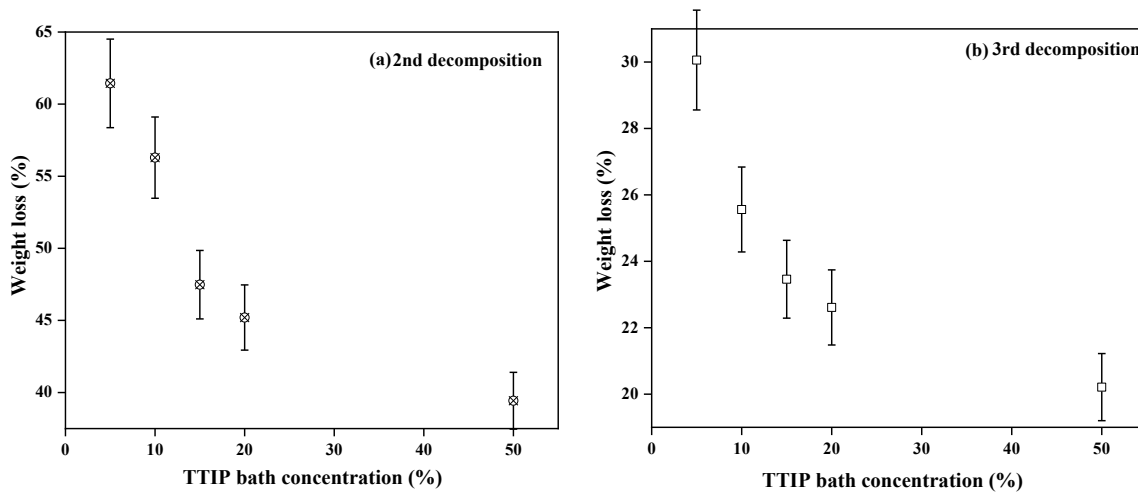

Fig. S4 Variation of the weight loss at (a) 2nd decomposition and (b) 3rd decomposition stage as a function of the TTIP bath concentration.

Table S1 Atomic wt% of the elements (C, O, Ti) observed from EDS analysis

| Name of the Fiber               | Points | Elements | wt%   |
|---------------------------------|--------|----------|-------|
| 10 wt% PVB-amTiO <sub>2</sub> F | 1      | C        | 63.17 |
|                                 |        | O        | 27.03 |
|                                 |        | Ti       | 8.17  |
|                                 | 2      | C        | 23.51 |
|                                 |        | O        | 10.19 |
|                                 |        | Ti       | Nil   |
|                                 | 3      | C        | 64.67 |
|                                 |        | O        | 28.02 |
|                                 |        | Ti       | 4.8   |
| 50 wt% PVB-amTiO <sub>2</sub> F | 1      | C        | 3.85  |
|                                 |        | O        | 8.15  |
|                                 |        | Ti       | 49.31 |
|                                 | 2      | C        | Nil   |
|                                 |        | O        | 1.32  |
|                                 |        | Ti       | 94.33 |
|                                 | 3      | C        | 16.11 |
|                                 |        | O        | 26.14 |
|                                 |        | Ti       | 50.82 |

Table S2 Effect of TTIP bath concentration on specific surface area of PVB-amTiO<sub>2</sub>F fibers

|    |       |
|----|-------|
| 10 | 15.30 |
| 15 | 14.12 |
| 20 | 16.75 |
| 50 | 12.40 |

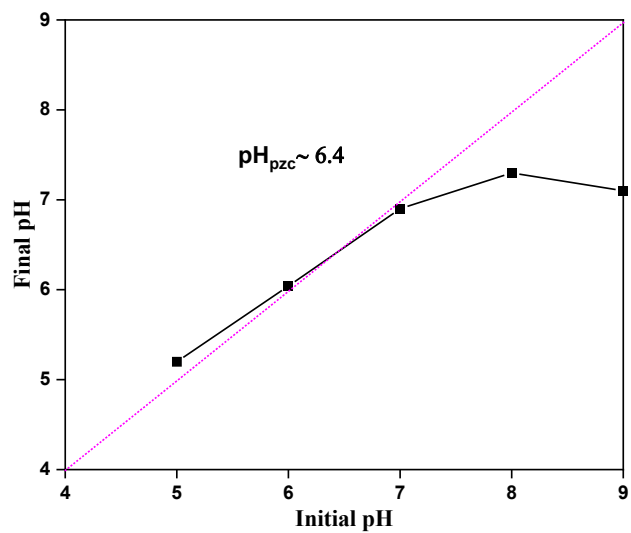

Fig. S5 Determination the  $\text{pH}_{\text{pzc}}$  of PVB-amTiO<sub>2</sub>F from the initial pH vs final pH cross-over point.

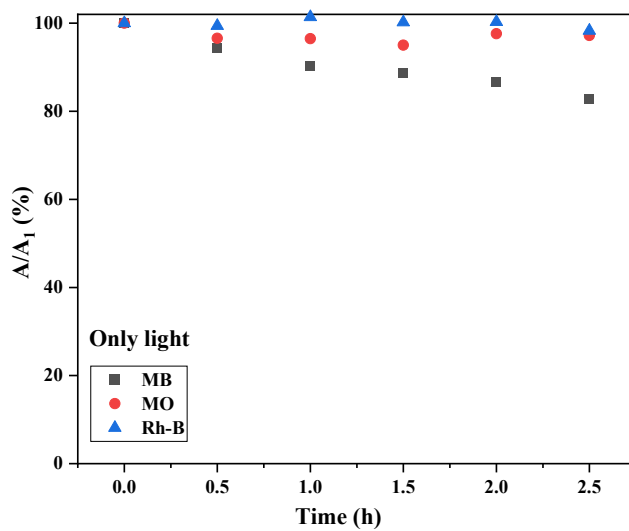

Fig. S6 Variation of dye absorbance in visible light, where no PVB-amTiO<sub>2</sub>F was added.
